# Supplementary material
Source: PubMed Central journal article supplement (PMC8417651)
Supplement: 13187_2021_2055_MOESM2_ESM.pdf [file 13187_2021_2055_MOESM2_ESM.pdf]

## What is RCC?

- Cancer originating from the kidney.
- 75000 new cases in US yearly and 15000 yearly deaths
- Male to Female ratio = 2:1
- Median age at diagnosis = 64 years
- Histologies: Clear cell RCC (80% of all RCC) versus non-clear cell RCC (20%)

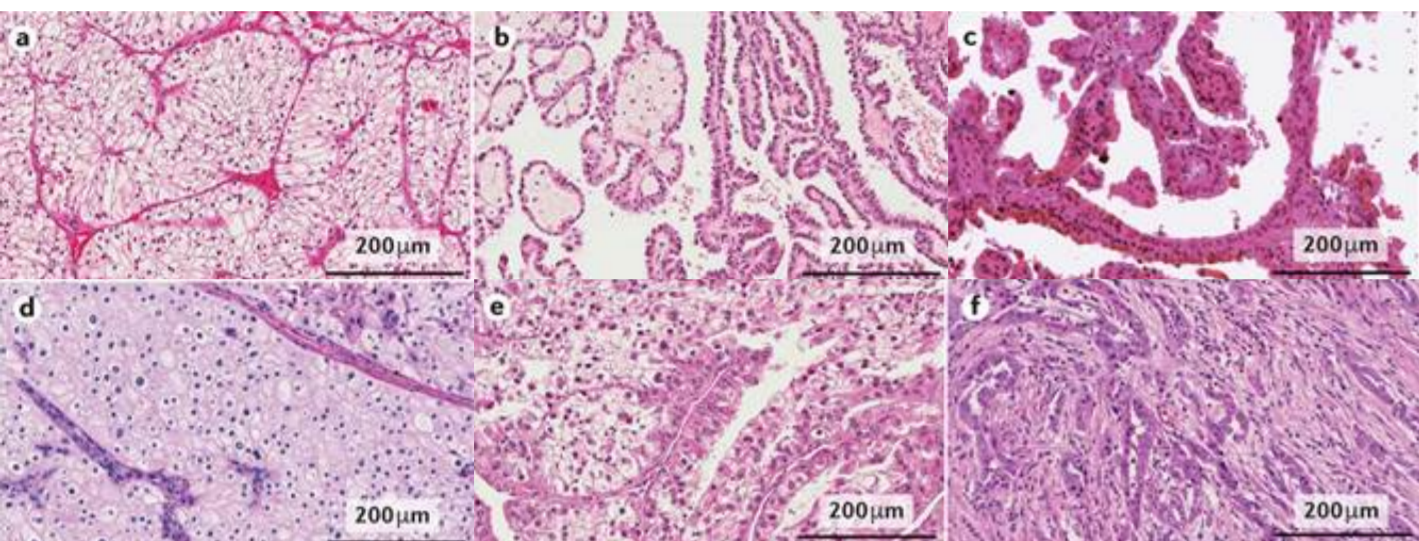

(Hsieh et al., Nat Rev Dis Primers, 2017)

a) Clear cell RCC (ccRCC); b) Papillary RCCs type 1 (basophilic); c) Papillary RCC type 2 (eosinophilic); d) Chromophobe RCCs; e) MiT family translocation RCCs and f) collecting duct RCCs.

## How do patients present?

- Incidental
- Local symptoms (Hematuria most common finding, flank pain).
- Systemic symptoms (Fever, weight loss, night sweats; paraneoplastic syndromes)
- Classic triad (flank pain, hematuria, and a palpable abdominal mass): 9% of patients

## Initial workup

| H&P                                                                           | Labs       | Imaging                                                                              | Tissue Diagnosis                                                                                               |
|-------------------------------------------------------------------------------|------------|--------------------------------------------------------------------------------------|----------------------------------------------------------------------------------------------------------------|
| Local symptoms: pain, hematuria                                               | CBC        | Abdominal (+pelvic) imaging (CT with IV contrast or MRI)                             | Biopsy standard for advanced disease (cytoreductive nephrectomy considered in some circumstances)              |
| Systemic symptoms: Fever, weight loss, night sweats; paraneoplastic syndromes | BMP & LFTs | Chest imaging (CXR technically OK for small, localized disease, but prefer CT chest) | For localized renal mass with high degree of suspicion, biopsy is sometimes not performed prior to nephrectomy |
|                                                                               | UA         | Guided by symptoms: MRI brain, bone scan                                             |                                                                                                                |
|                                                                               | LDH        |                                                                                      |                                                                                                                |

## Pearls

- Bilateral RCCs suggest a possible genetic cancer predisposition syndrome
- Stauffer's syndrome: Paraneoplastic syndrome of hepatic dysfunction in the absence of liver metastasis.

## Staging and 5-year survival

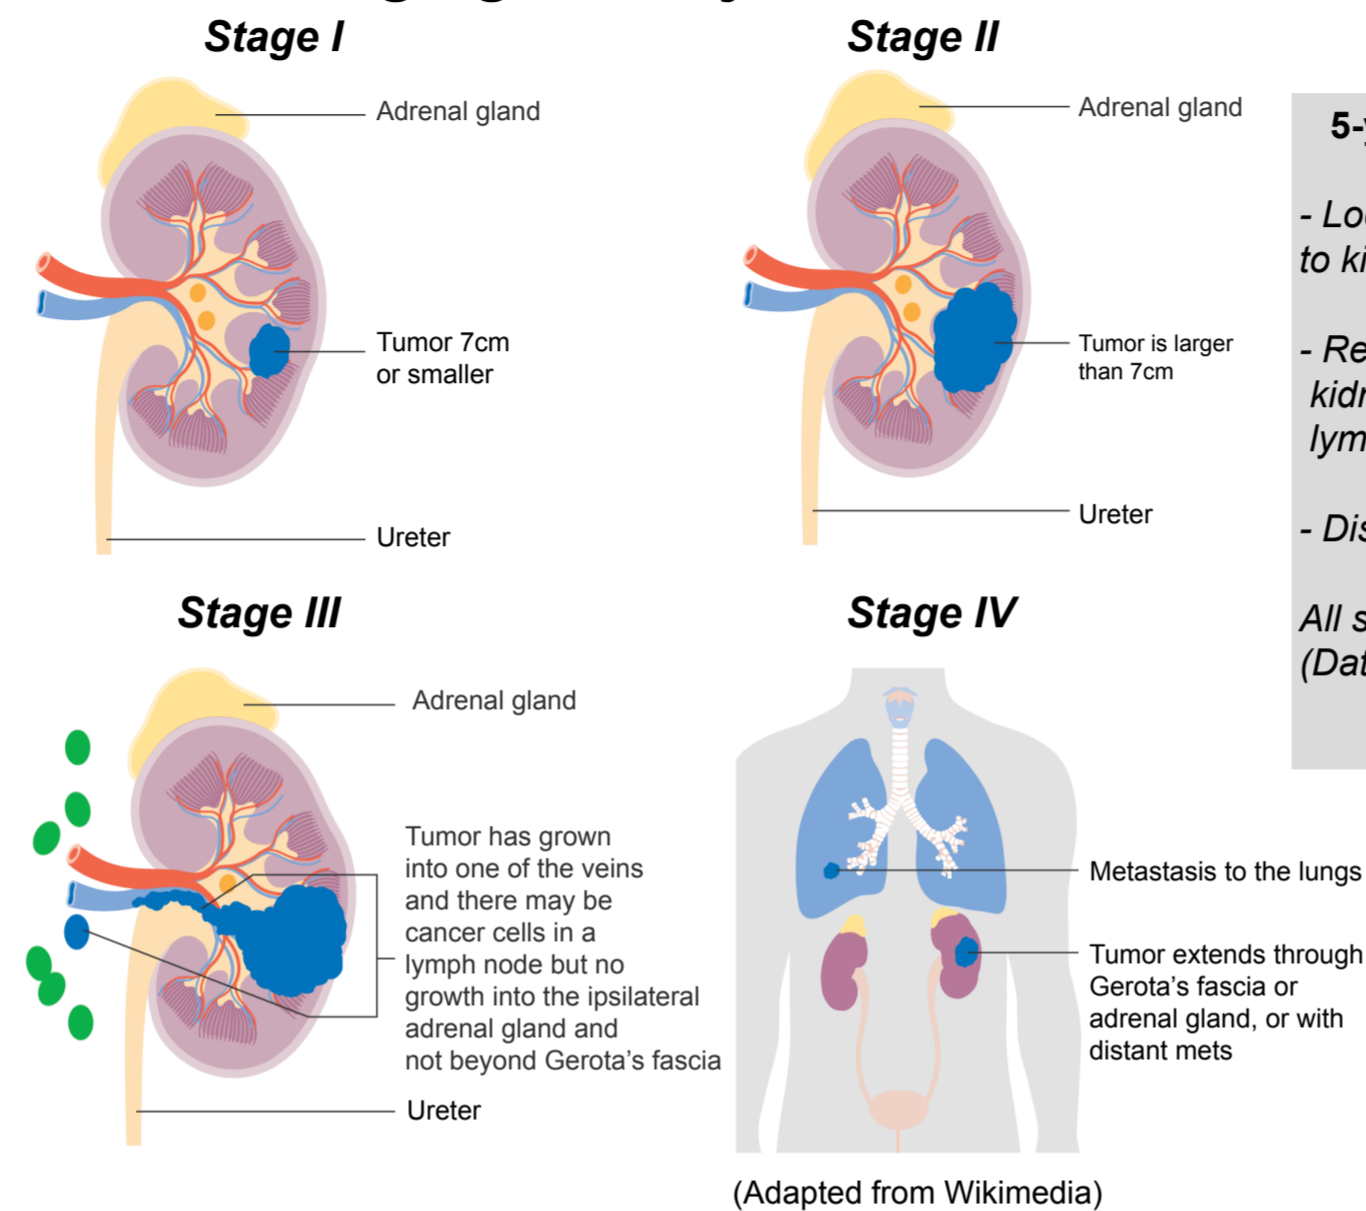

### 5-year overall survival

- Localized (spread restricted to kidney) - OS 93%
- Regional (spread outside the kidney to nearby structures or lymph nodes) - OS 70%
- Distant (stage IV) - 13%
- All stages combined: 75% (Data obtained from SEER)

## Principles of treatment:

| Very Early (T1a)                                                     | Early (Stage I/II) | Locally advanced (Stage III)                                                                        | Advanced (Stage IV)                                          |
|----------------------------------------------------------------------|--------------------|-----------------------------------------------------------------------------------------------------|--------------------------------------------------------------|
| Partial nephrectomy                                                  | Nephrectomy        | Nephrectomy                                                                                         | Systemic therapy                                             |
| Ablation is alternative (but should obtain tissue diagnosis first!)  |                    | Adjuvant therapy is controversial (sunitinib FDA approved; but conflicting data, and no OS benefit) | Consider cytoreductive nephrectomy in specific circumstances |
| Active surveillance for some patients with small renal masses (SRMs) |                    |                                                                                                     |                                                              |

## Risk Stratification for advanced disease: IMDC vs MSKCC

| RISK FACTOR                                         | MSKCC RISK FACTORS | IMDC RISK FACTORS |
|-----------------------------------------------------|--------------------|-------------------|
| Time from diagnosis to systemic treatment < 1 year  | X                  | X                 |
| Hemoglobin less than lower limit of normal          | X                  | X                 |
| Calcium greater than upper limit of normal          | X                  | X                 |
| Performance Status (Karnofsky) <80%                 | X                  | X                 |
| LDH greater than 1.5 upper limit of normal          | X                  |                   |
| Neutrophil count greater than upper limit of normal |                    | X                 |
| Platelet count greater than upper limit of normal   |                    | X                 |

(Adapted from urotoday)

0 Risk factors = Favorable prognosis, 1-2 Risk Factors = Intermediate, >2 Risk Factors = Poor  
Note: Patients with de novo metastatic disease are at least intermediate risk

## What is systemic therapy in advanced RCC?

First step: Calculate IMDC Risk score and categorize patients into favorable/intermediate/poor

| 1st line                                                                                                      | 2nd line and beyond*                                        | Considerations                                                                                                                                       |
|---------------------------------------------------------------------------------------------------------------|-------------------------------------------------------------|------------------------------------------------------------------------------------------------------------------------------------------------------|
| IMDC Favorable risk: Pembro+Axitinib<br>VEGF monotherapy (Sunitinib, cabozantinib, pazopanib) acceptable here | VEGF TKI monotherapy: Cabo, axitinib>>>sunitinib, pazopanib | Cytoreduction for oligometastatic disease                                                                                                            |
| IMDC Intermediate/poor risk:<br>Combination therapy (Pembro+axitinib or Nivo/Ipi)                             | Lenvatinib + Everolimus                                     | Radiation: RCC historically considered radioresistant, but newer data does indicate responsiveness to SBRT which is now an emerging treatment option |
| Rarely used (but approved in certain circumstances): VEGF monotherapy, HD-IL2, tlemsirrolimus                 | Everolimus monotherapy                                      |                                                                                                                                                      |

\* Treatments on the horizon: HIF2-alpha inhibitors, Tivozanib

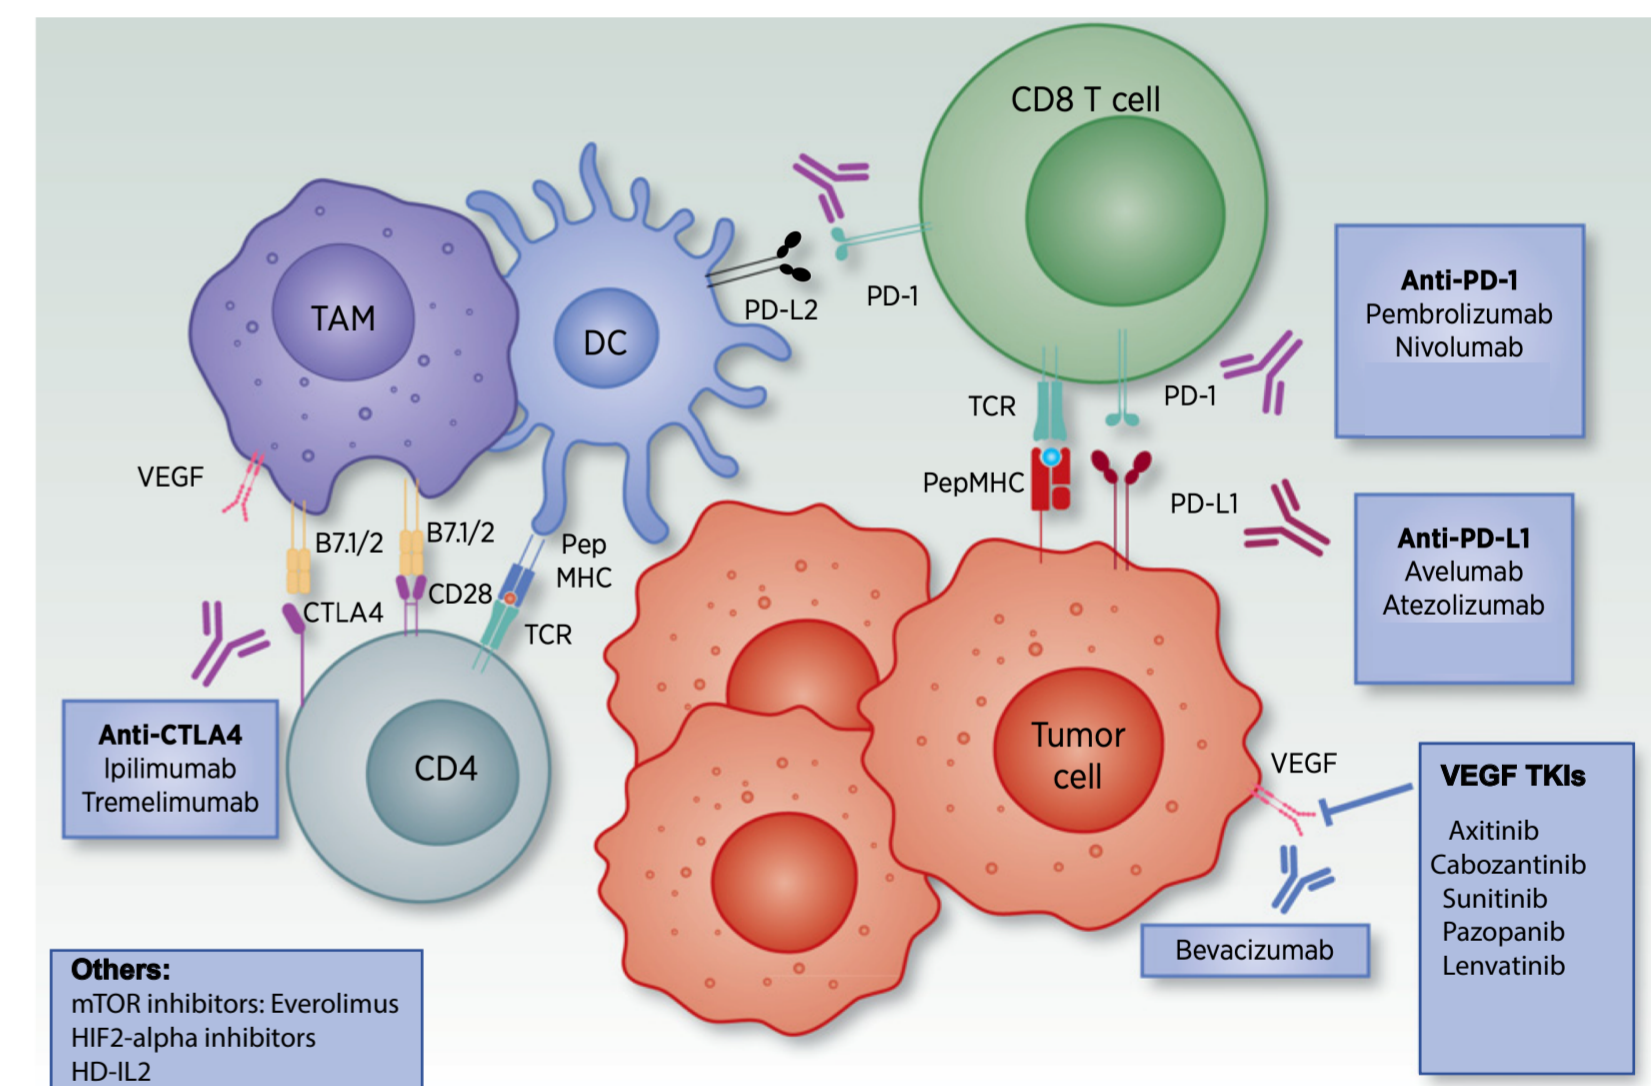

(Aggen et al., Clin Cancer Res., 2020)

Figure: PD-1/PD-L1 targeted therapeutics in RCC. Overview of current immunotherapy targets in RCC. The PD-1 antibodies pembrolizumab and nivolumab prevent interaction with PD-L1 and PD-L2. In contrast, the PD-L1 antibodies avelumab and atezolizumab prevent PD1 ligation, but leave PD-1 and PD-L2 ligation unopposed.

## “Deep Dive” questions:

- Is there a role for cytoreductive nephrectomy in metastatic RCC patients?
- Is there a role for adjuvant therapy in RCC treatment?
- When do you consider surgical resection in metastatic disease?
- How do you treat patients who progressed on immune checkpoint inhibitor therapy?

## References

1. Aggen DH, Drake CG, Rini BI. Targeting PD-1 or PD-L1 in Metastatic Kidney Cancer: Combination Therapy in the First-Line Setting. Clin Cancer Res. 2020;26(9):2087-95.
2. Hsieh JJ, Purdie MP, Signoretti S, Swanton C, Albiges L, Schmidinger M, et al. Renal cell carcinoma. Nat Rev Dis Primers. 2017;3:17009.
3. Rini BI, Plimack ER, Stus V, Gafanov R, Hawkins R, Nosov D, et al. Pembrolizumab plus Axitinib versus Sunitinib for Advanced Renal-Carcinoma. N Engl J Med. 2019;380(12):1116-27
